# Supplementary material for: Insight into the structural stability of coumestrol with human estrogen receptor α and β subtypes: a combined approach involving docking and molecular dynamics simulation studies
Source: Royal Society of Chemistry journal article supplement (doi:10.1039/c5ra14745j), 2015-01-01
Supplement: c5ra14745j1.pdf [file c5ra14745j1.pdf]

# **Electronic Supplementary Information (ESI)**

**Insight into the structural stability of Coumestrol with Human Estrogen Receptor  $\alpha$  and  $\beta$  subtypes: A combined approach involving docking and molecular dynamics simulation studies**

**Atif Zafar <sup>1 #</sup>, Sabahuddin Ahmad <sup>2 #</sup>, Imrana Naseem <sup>1 \*</sup>**

<sup>1</sup> Department of Biochemistry, Faculty of Life Sciences,  
Aligarh Muslim University, Aligarh 202002, Uttar Pradesh, India

<sup>2</sup> Department of Computer Science, Faculty of Natural Sciences,  
Jamia Millia Islamia, New Delhi 110025, India

<sup>#</sup> Co-first authors, <sup>\*</sup>Corresponding author: [imrananaseem2009@gmail.com](mailto:imrananaseem2009@gmail.com)

**Table S1 AutoDock analysis of docked coumestrol with ER $\beta$  protein without removing active site water molecule**

| AutoDock Parameter                      | Coumestrol-ER $\beta$                  |
|-----------------------------------------|----------------------------------------|
| Binding energy (kcal/mol)               | -9.0                                   |
| Inhibition constant (nM)                | 253.57                                 |
| Intermolecular energy                   | -9.57                                  |
| Van der Waals H-bond desolvation energy | -8.97                                  |
| AutoDock refRMS                         | 35.21                                  |
| No. of Hydrogen bonds                   | 5                                      |
| Residues involved in hydrogen bonding   | Glu305, Leu339, Arg346, Gly472, His475 |

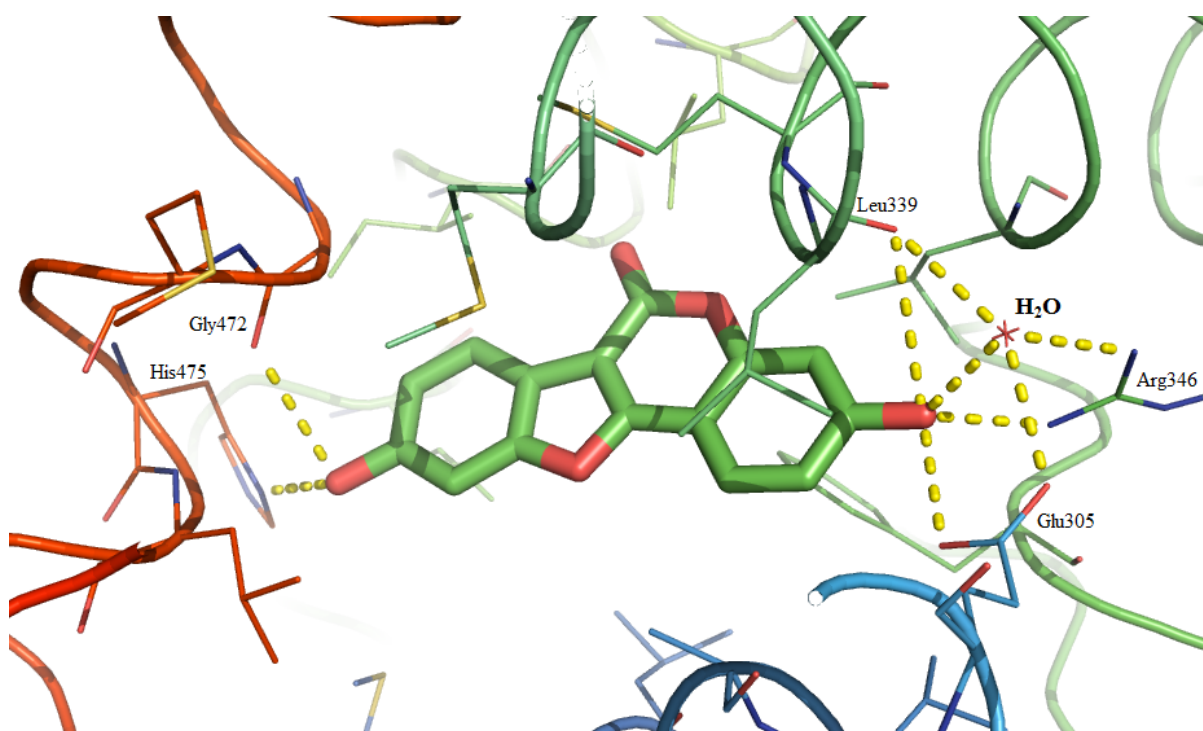

**Fig. S1 Binding modes of coumestrol docked into human ER $\beta$  binding site without removing active site water molecule. Coumestrol forms 5 hydrogen bonds with ER $\beta$  residues. Water molecule in ER $\beta$  system is represented by red ‘\*’.**

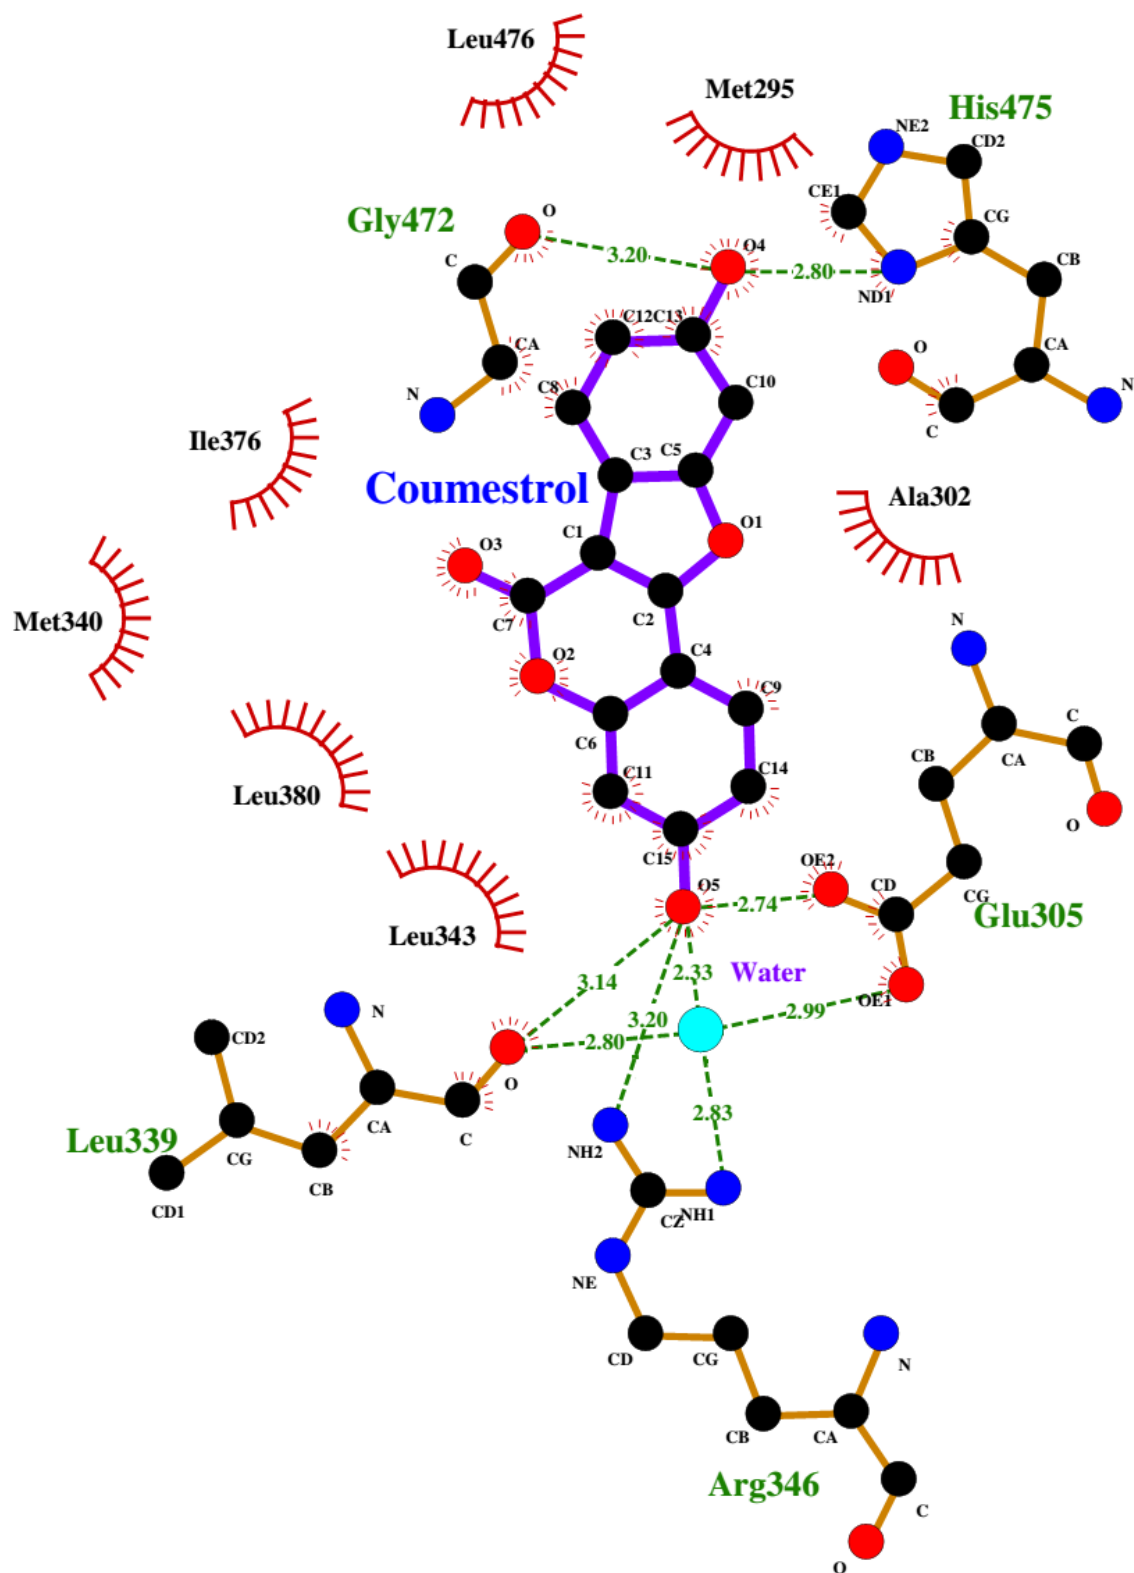

Fig. S2 Detailed interaction view of coumestrol with human ERβ (with active site water molecule) by Ligplot.

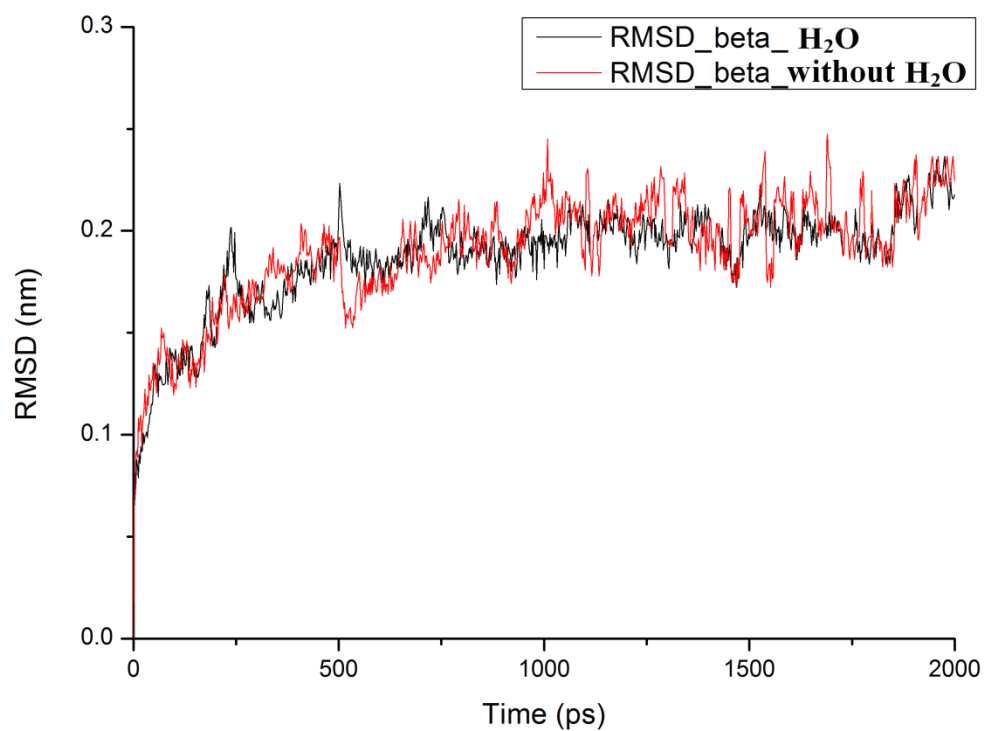

**Fig. S3 Backbone RMSD plots of coumestrol-ER $\beta$  complex during MD simulation at 300 K. Black colour RMSD plot indicates coumestrol-ER $\beta$  complex (with active site water molecule) and red colour RMSD plot indicates coumestrol-ER $\beta$  complex (without active site water molecule).**

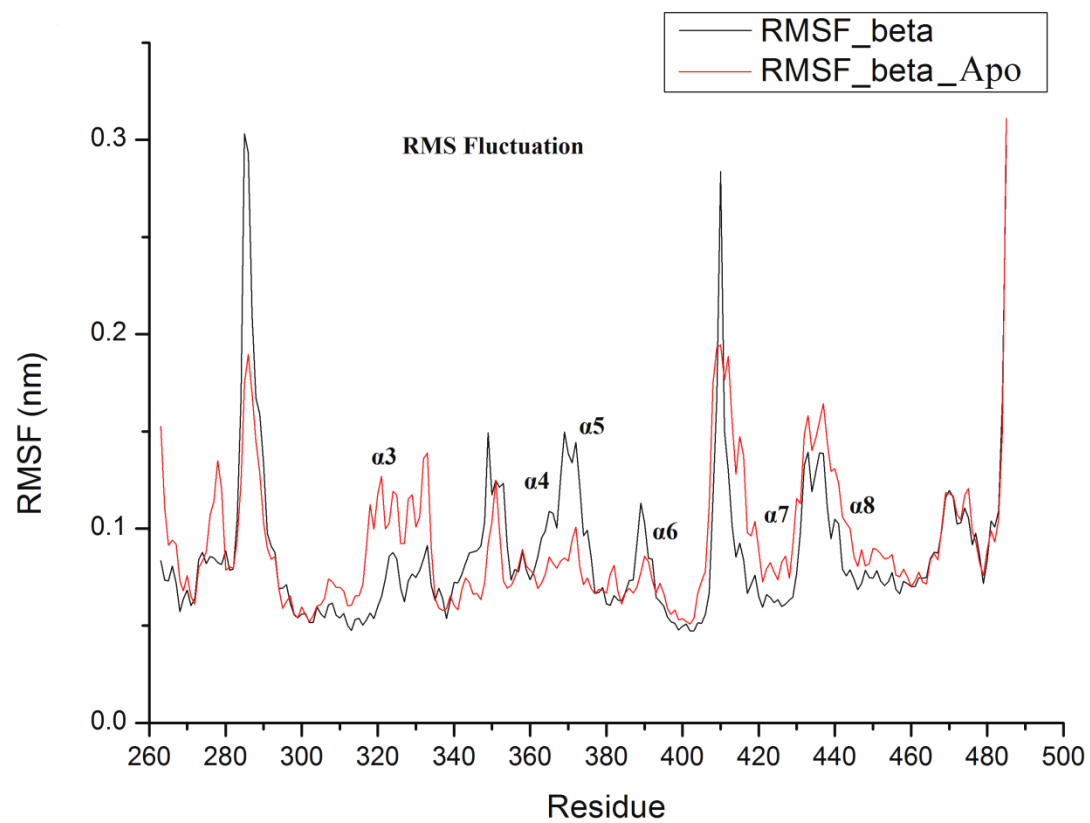

**Fig. S4 RMSF of backbone atoms of Apo-ER $\beta$  and coumestrol-ER $\beta$  complex with active site water molecule at 300 K.**

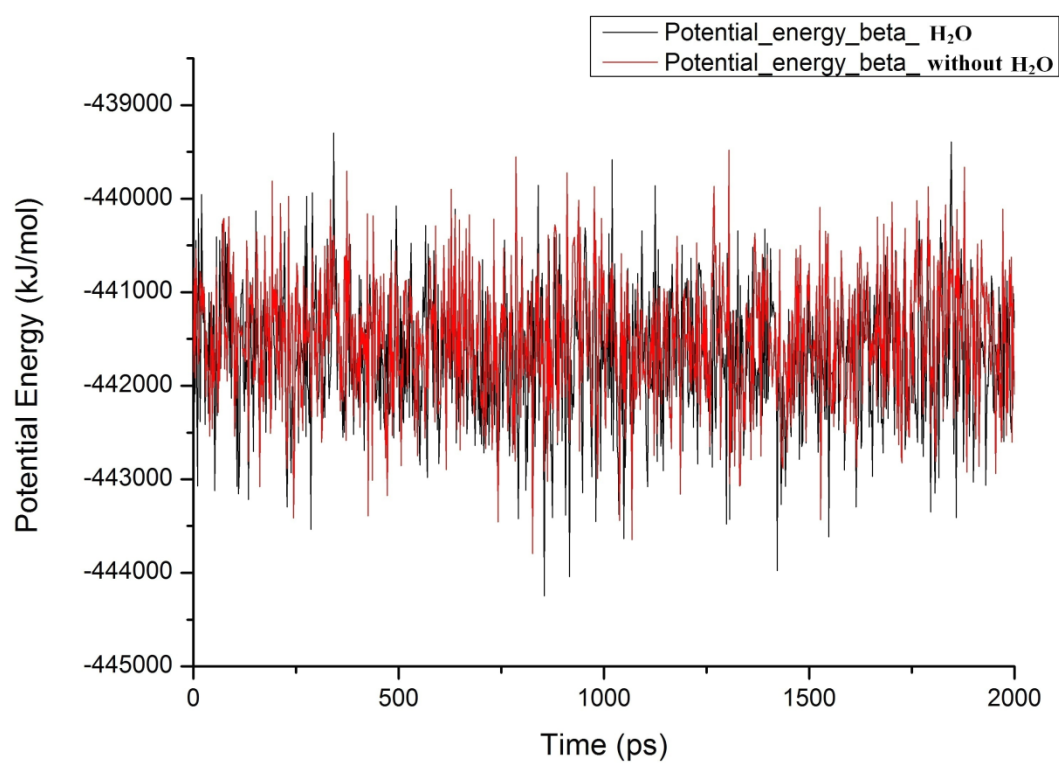

**Fig. S5 Potential energy plots of coumestrol-ER $\beta$  complex with (shown in black) and without (shown in red) the active site water molecule during MD simulations.**

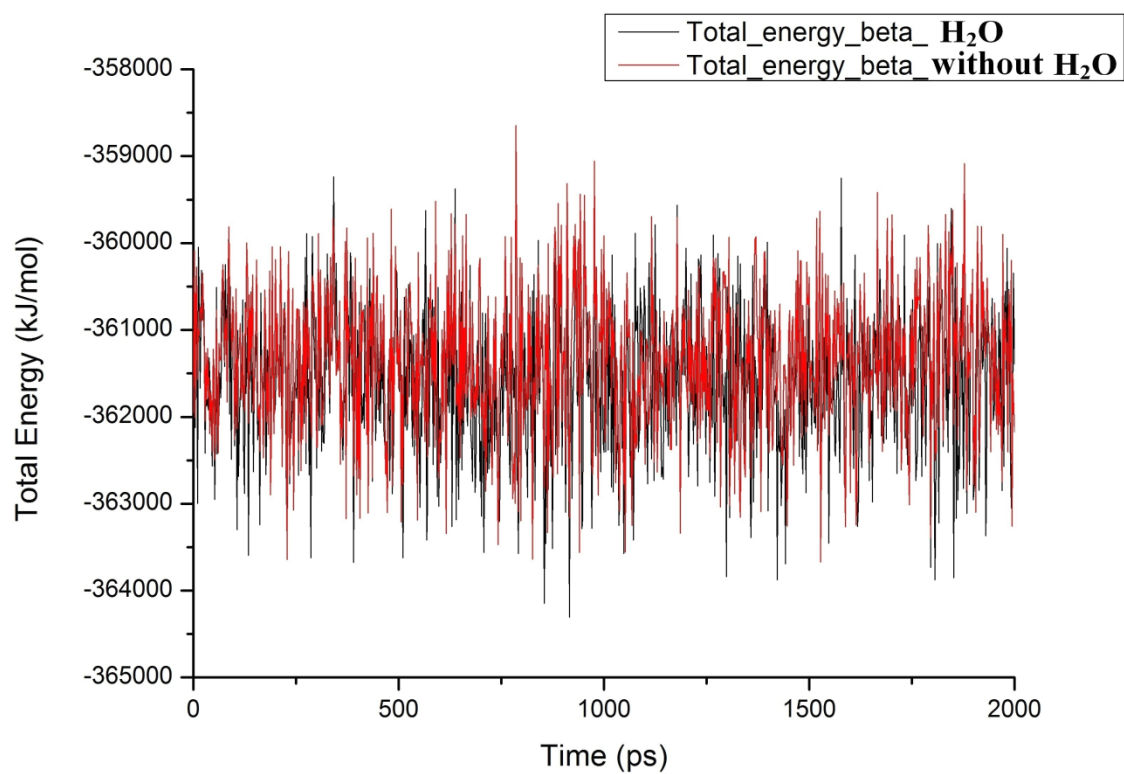

**Fig. S6 Total energy plots of coumestrol-ER $\beta$  complex with (shown in black) and without (shown in red) the active site water molecule during MD simulations.**

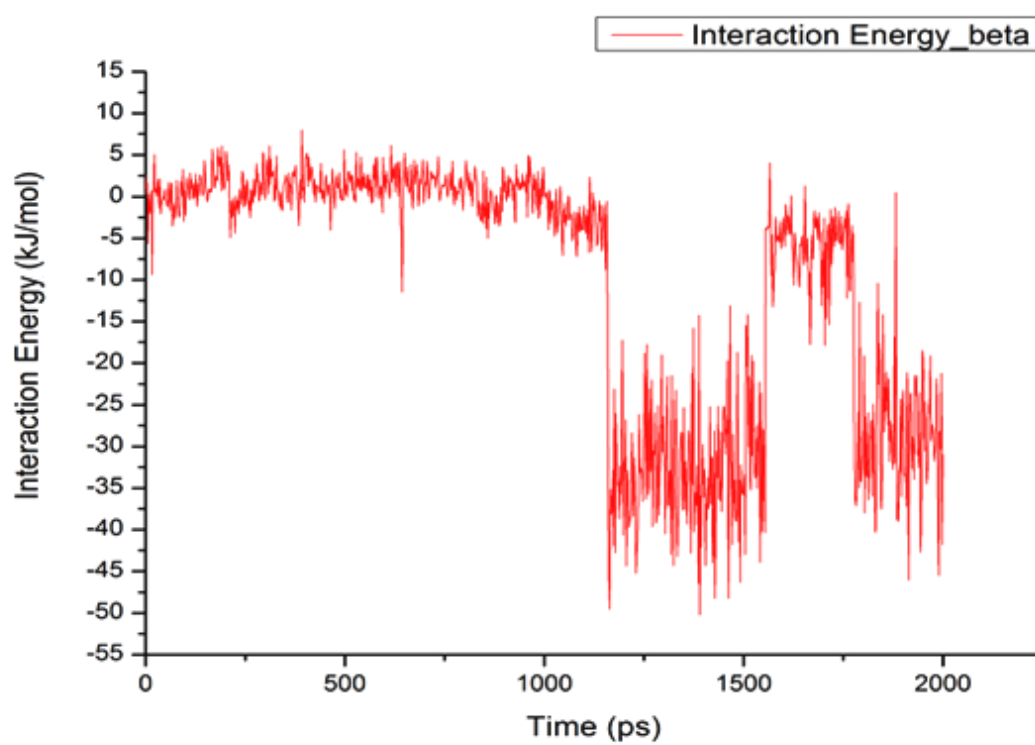

**Fig. S7 Interaction energy plot for 2 ns MD simulation of coumestrol-ER $\beta$  complex with active site water molecule.**

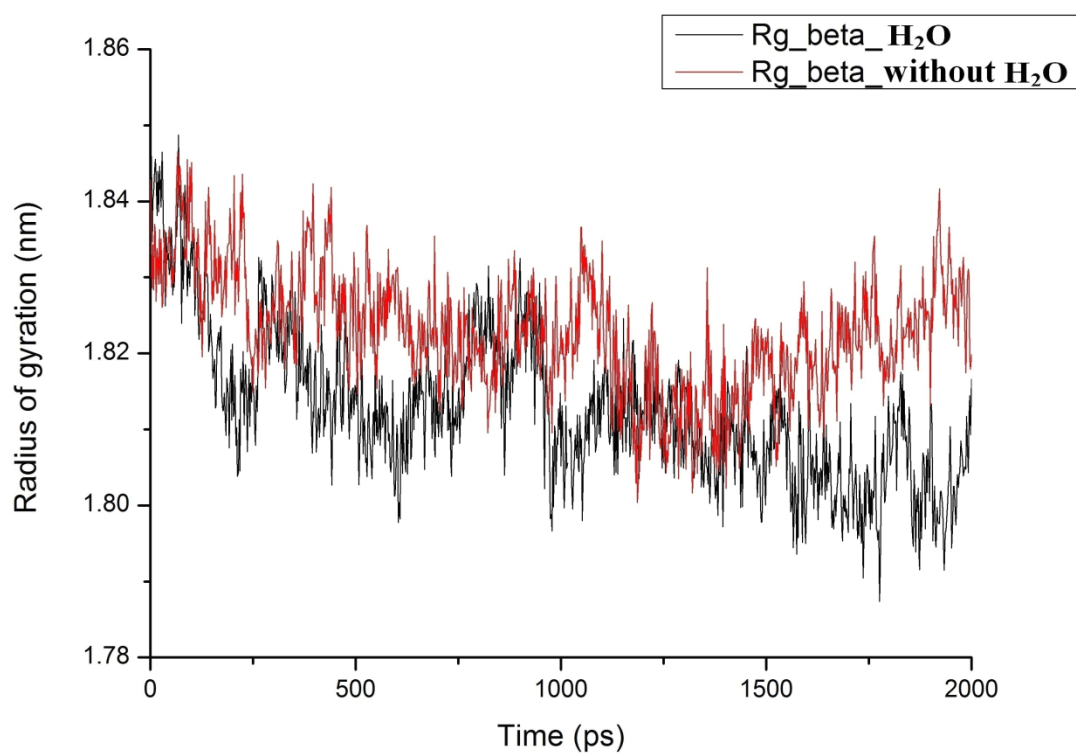

**Fig. S8 Variation of gyration radius ( $R_g$ ) of ER $\beta$  backbone atoms calculated as a function of time for coumestrol-ER $\beta$  complex with (shown in black) and without (shown in red) the active site water molecule.**

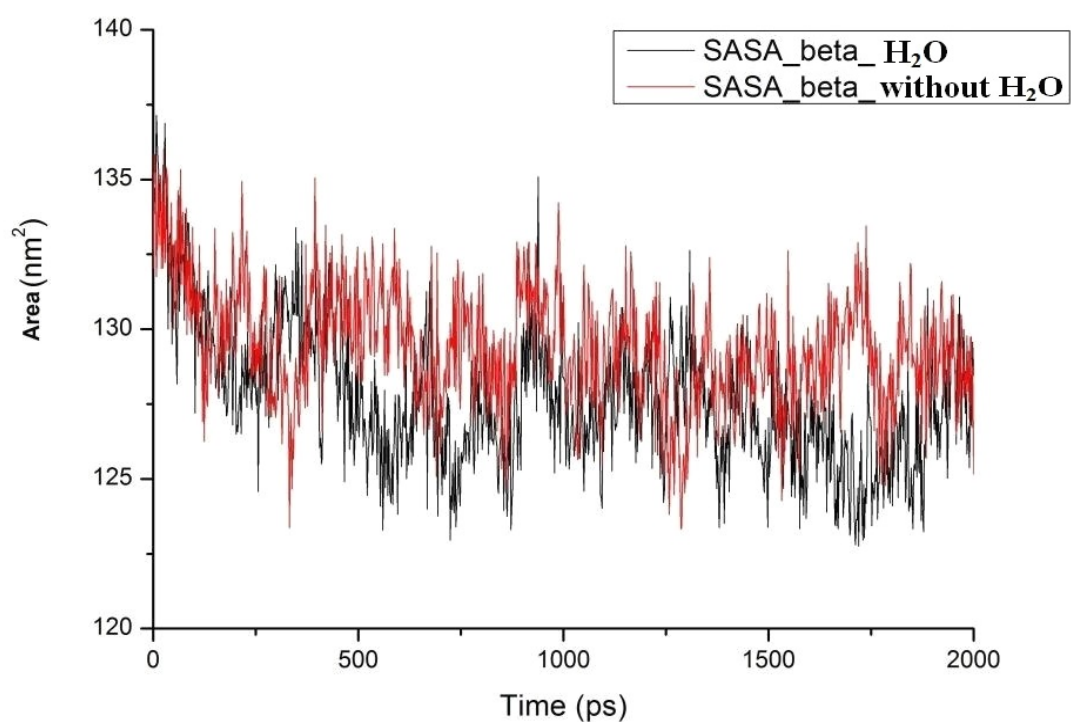

**Fig. S9 Solvent accessible surface area (SASA) during 2 ns simulations calculated from trajectory files for coumestrol-ER $\beta$  complex with (shown in black) and without (shown in red) the active site water molecule.**

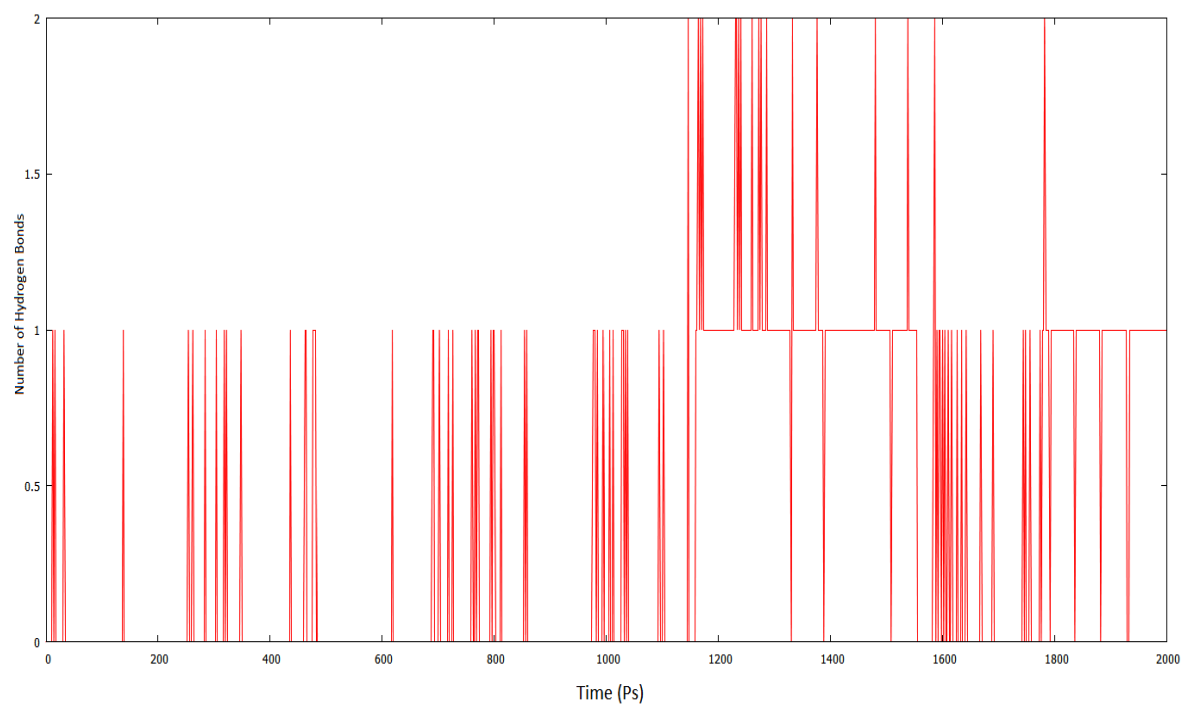

**Fig. S10 Stability evaluation of coumestrol-ER $\beta$  complex (with active site water molecule) using intermolecular hydrogen bonding pattern as a function of time.**

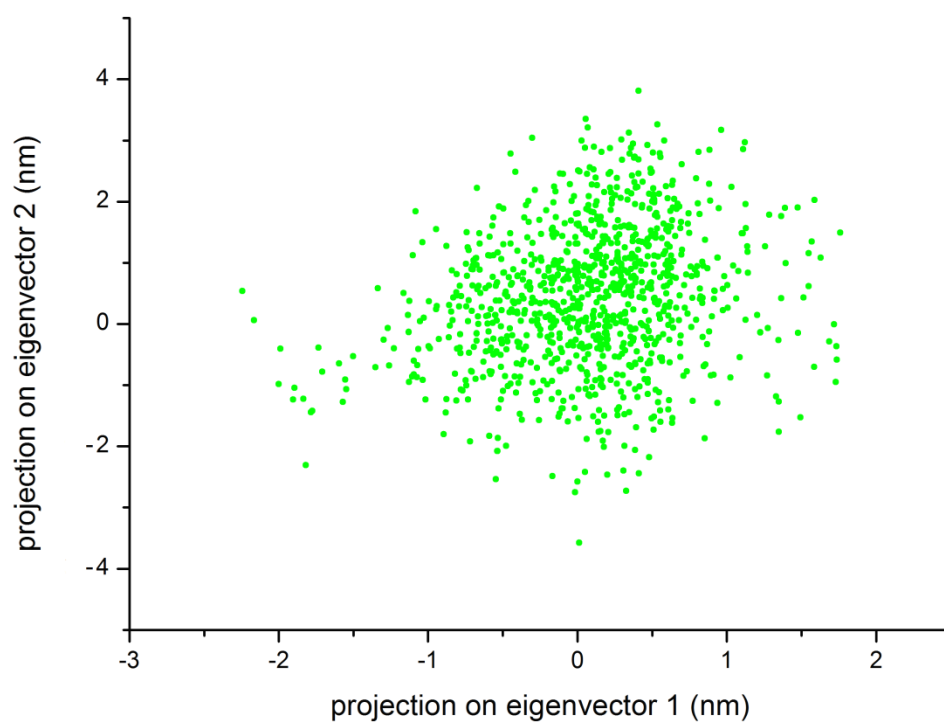

**Fig. S11 2D projection of the backbone atoms of coumestrol-ER $\beta$  system with active site water molecule over the first two principal components.**

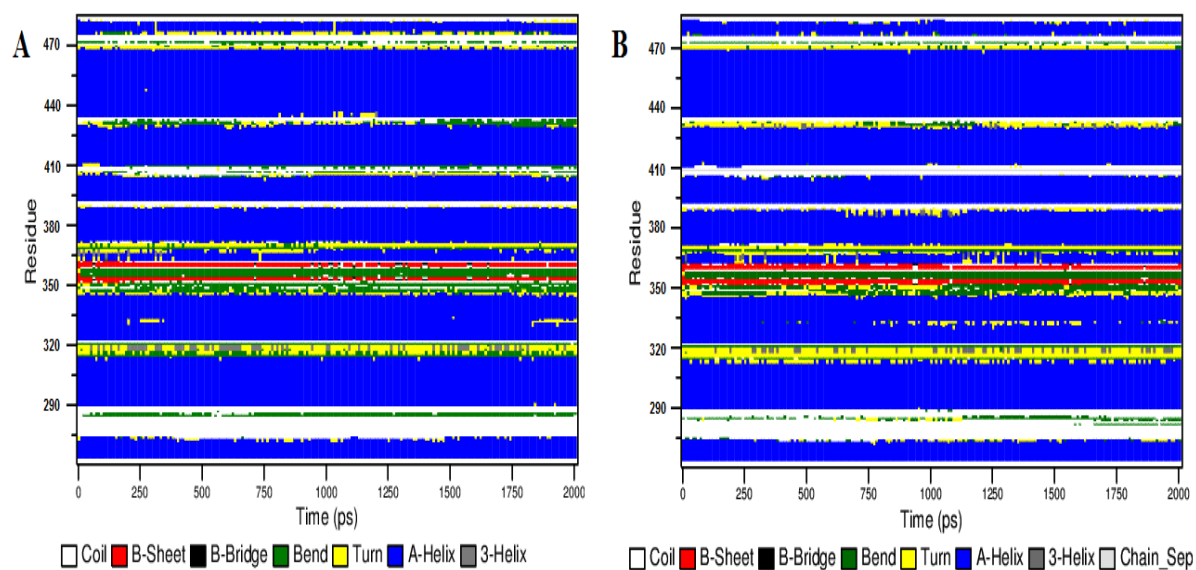

**Fig. S12 Secondary structure elements changes during the 2 ns MD simulation at 300 K. (A) Apo-ER $\beta$  with active site water molecule and (B) coumestrol-ER $\beta$  complex with active site water molecule. The colour scale at the bottom represents the DSSP classification of each secondary structure element.**
